# Supplementary material for: New pathogenic variants and insights into pathogenic mechanisms in GRK1-related Oguchi disease
Source: bioRxiv or medRxiv preprint supplement (doi:10.1101/2020.02.20.936880), 2020-03-25

**A**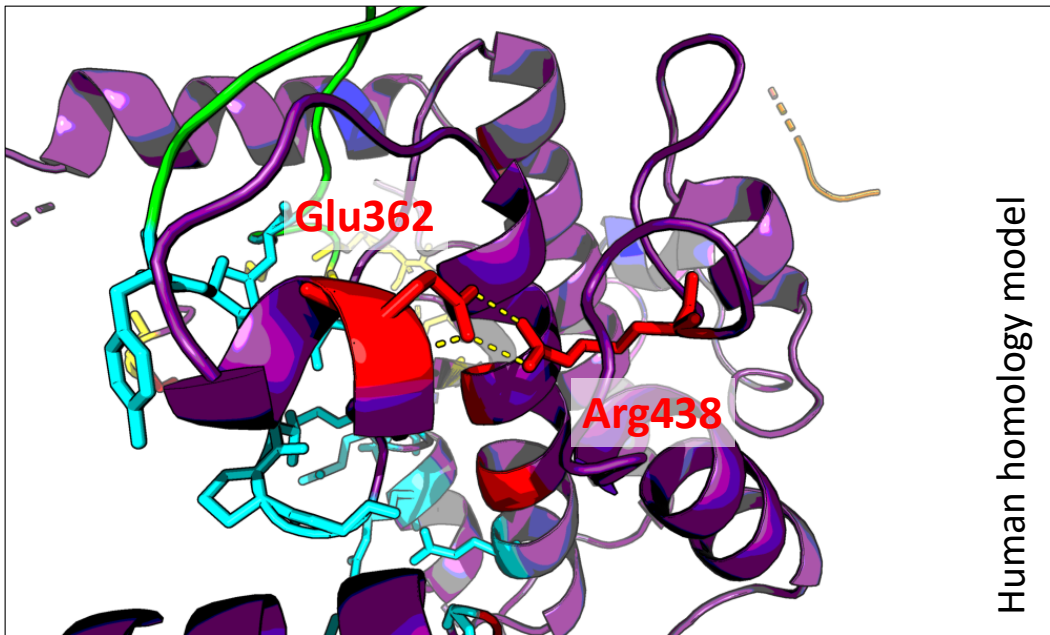

**Supplementary Figure 2 – Mutations at Glu362 and Arg438 are likely to affect GRK1 structure through disruption of a salt bridge interaction.**

- A) Human homology model of GRK1 showing residues Glu362 and Arg438 interacting via a salt bridge. Substitution of either residue has been identified as a cause of Oguchi disease.
- B) The homologous region in the bovine GRK1 crystal structure, showing the same residues (Glu359 and Arg435) interacting via a salt bridge.

**B**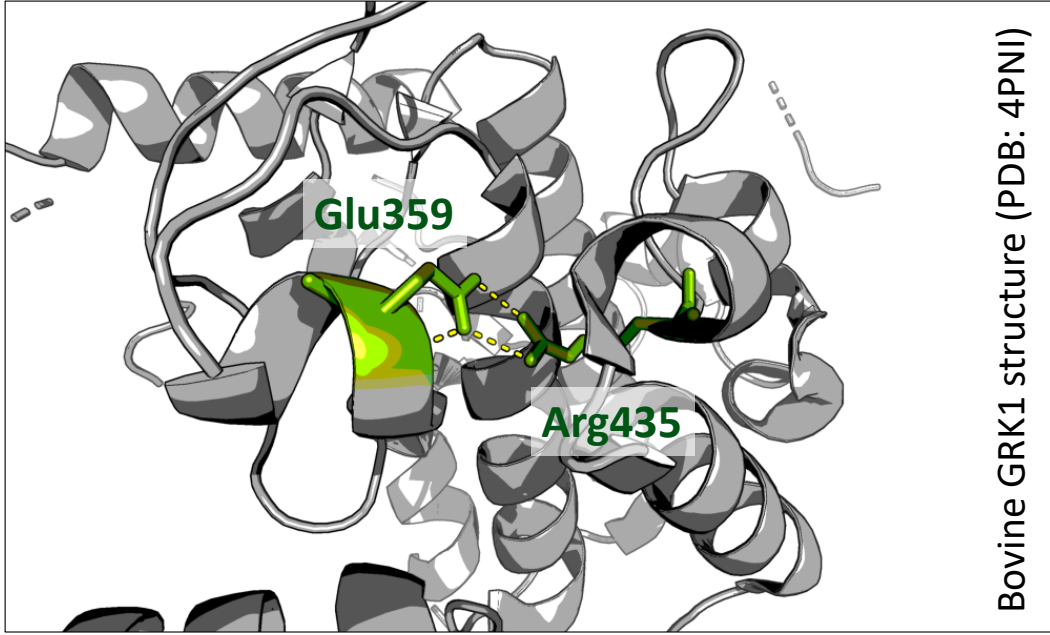

Supplement: Supplementary file [file media-2.pdf]
